# Supplementary material for: Integrated Evaluation of Urban Development Suitability Based on Remote Sensing and GIS Techniques – A Case Study in Jingjinji Area, China
Source: MDPI journal article supplement (doi:10.3390/s8095975), 2008-09-25
Supplement: s1 [file s1]

Correction

**Correction: Dong, J. et al. Integrated Evaluation of Urban Development Suitability Based on Remote Sensing and GIS Techniques—A Case Study in Jingjinji Area, China. *Sensors* 2008, 8, 5975–5986**

**Jiang Dong \*, Dafang Zhuang, Xinliang Xu and Lei Ying**

State Key Lab of Resources and Environmental Information System, Institute of Geographical Sciences and Natural Resources Research, Chinese Academy of Sciences, Beijing 100101, China

\* Author to whom correspondence should be addressed; E-Mail: jiangd@igsrr.ac.cn;  
Tel. +86-10-64889433.

Received: 25 January 2010 / Published: 25 January 2010

---

We found that formula (1) was incorrect in our paper published in *Sensors* in 2008 [1]. Therefore, formula (1) is corrected as follows:

$$\text{UDSI} = \sum_{i=1}^n W_i * C_i \quad (1)$$

## References

1. Dong, J.; Zhuang, D.; Xu, X.; Ying, L. Integrated Evaluation of Urban Development Suitability Based on Remote Sensing and GIS Techniques—A Case Study in Jingjinji Area, China. *Sensors* 2008, 8, 5975–5986.

© 2010 by the authors; licensee Molecular Diversity Preservation International, Basel, Switzerland. This article is an open-access article distributed under the terms and conditions of the Creative Commons Attribution license (<http://creativecommons.org/licenses/by/3.0/>).
